# Supplementary material for: Left Atrial Size and Function in a Canine Model of Chronic Atrial Fibrillation and Heart Failure
Source: PLoS One. 2016 Jan 15;11(1):e0147015. doi: 10.1371/journal.pone.0147015 (PMC4714887; doi:10.1371/journal.pone.0147015)
Supplement: S2 Table — Max LVP: maximum left ventricular pressure; LV EDP: left ventricular end-diastolic pressure; LV Mean DP: mean diastolic left ventricular pressure; Max(Min) dLVP/dt: Maximal (minimal) first time derivative of left ventricular pressure; Tau: time constant of isovolumic pressure decay. (XLSX) [file pone.0147015.s002.xlsx]

## Sheet: S1 Table
DOGID	Group (VNS/control)	RR (ms)	Max LVP (mm Hg)	LV EDP (mm Hg)	LV Mean DP (mm Hg)	Max dLVP/dt	Min dLVP/dt (mmHg/s)	tau (ms)
10-D-081	control	558.731	65.6054	11.082	10.088	822.881	-1004.74	82.3912
10-D-078	control	598.409	55.5061	13.0084	11.9061	582.333	-717.302	103.124
10-D-083	control	663.389	69.2836	15.5769	14.6021	633.036	-875.358	156.525
10-D-074	control	712.784	56.4053	7.0782	6.27256	797.544	-850.573	90.513
10-D-048	control	853.671	84.1242	4.89907	4.01848	1179.77	-1300.01	78.5826
10-D-084	control	1038.87	68.5622	5.62269	4.33125	832.973	-1027.73	67.3966
115	VNS	376.789	96.2708	6.19521	6.03151	1493.11	-2032.91	70.5355
110	VNS	409.686	69.0025	5.44236	4.49541	1136.87	-1128.44	90.6603
09-D-86	VNS	437.953	58.8595	10.0847	9.10153	807.073	-874.773	132.146
109	VNS	451.29	70.7761	5.23841	4.22517	820.551	-945.876	96.5398
09-D-85	VNS	548.371	74.2236	16.2042	15.3191	849.57	-1064.68	104.981
116	VNS	572.841	87.331	5.70187	4.06262	1206.17	-1451.09	56.3916
09-D-82	VNS	601.683	76.0756	10.1915	8.5274	996.652	-1283.86	65.3961
10-D-075	VNS	700.858	92.6731	8.08901	6.83639	1513.77	-1751.05	46.8872
09-D-84	VNS	1084.08	75.5149	9.47268	7.99742	801.825	-1285.09	65.9434
